# Supplementary material for: Hydrogen Oxidation Influences Glycogen Accumulation in a Verrucomicrobial Methanotroph
Source: PubMed Central journal article supplement (PMC6706786; doi:10.3389/fmicb.2019.01873), 2019-08-16
Supplement: Data_Sheet_1.pdf [file Data_Sheet_1.pdf]

**Title:** Hydrogen Oxidation Influences Glycogen Accumulation in a Verrucomicrobial Methanotroph

Carlo R. Carere<sup>1\*</sup>, Ben McDonald<sup>2</sup>, Hanna A. Peach<sup>3</sup>, Chris Greening<sup>4</sup>, Daniel J. Gapes<sup>2</sup>, Christophe Collet<sup>2</sup>, Matthew B. Stott<sup>5</sup>

**Author affiliations:**

<sup>1</sup> Department of Chemical and Process Engineering, University of Canterbury, Christchurch, 8041 New Zealand

<sup>2</sup> Scion, Te Papa Tipu Innovation Park, Rotorua, New Zealand

<sup>3</sup> Geomicrobiology Research Group, Department of Geothermal Sciences, GNS Science, Taupō, 3384, New Zealand

<sup>4</sup> School of Biological Sciences, Monash University, Clayton, VIC, 3800, Australia

<sup>5</sup> School of Biological Sciences, University of Canterbury, Christchurch, 8041, New Zealand

\* Corresponding author (email: carlo.carere@canterbury.ac.nz)

**Supplemental Materials**

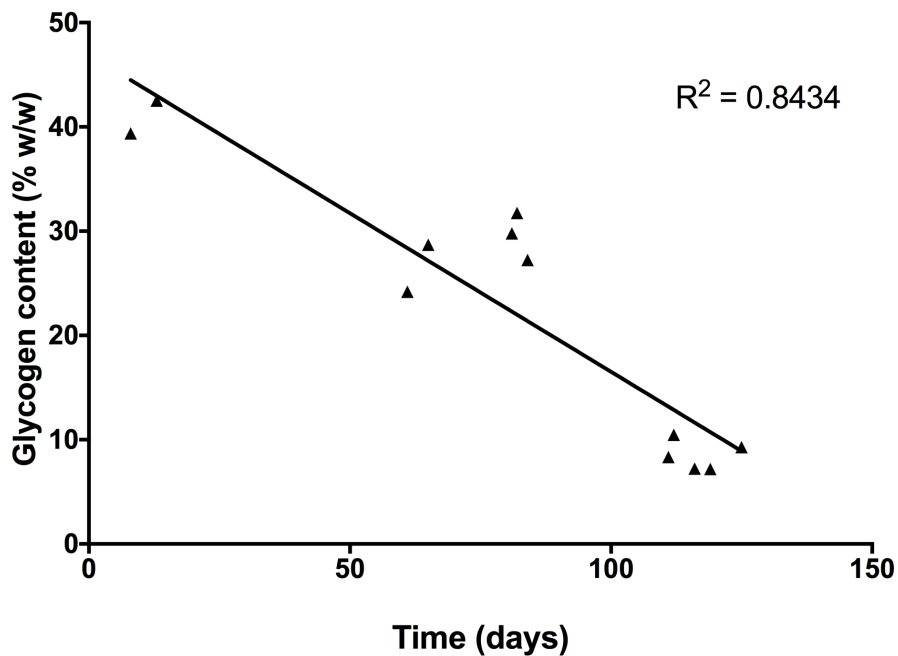

**Figure S1.** *Methylacidiphilum* sp. RTK17.1 intracellular glycogen reservoirs are slowly consumed during methane starvation at 4 °C. Multiple chemostat cultures samples (200 ml), grown under O<sub>2</sub>-limited, N<sub>2</sub>-fixing conditions in the absence of H<sub>2</sub> addition, were collected into sealed Pyrex 1l bottles (air headspace) and incubated at 4 °C without further nutrient supplementation. Periodically, the glycogen content of biomass was determined as described in the methods section.

**Table S1.** Expression profiles (FPKM) of key genes encoded in the *Methylacidiphilum* sp. RTK17.1 genome in response to changes to chemostat growth operation. Amino acid orthologs to *Methylacidiphilum inferorum* V4 are shown.

| Gene                                       | Predicted Function                           | Gene ID * | <i>M. inferorum</i> V4 ortholog |           |      | Expression (FPKM)                                             |                                                            |                                                                          |                                                                                |                                                                             |
|--------------------------------------------|----------------------------------------------|-----------|---------------------------------|-----------|------|---------------------------------------------------------------|------------------------------------------------------------|--------------------------------------------------------------------------|--------------------------------------------------------------------------------|-----------------------------------------------------------------------------|
|                                            |                                              |           | Accession                       | locus tag | % ID | N <sub>2</sub> ,<br>low O <sub>2</sub> ,<br>no H <sub>2</sub> | N <sub>2</sub> ,<br>low O <sub>2</sub> ,<br>H <sub>2</sub> | NH <sub>4</sub> <sup>+</sup> ,<br>low O <sub>2</sub> ,<br>H <sub>2</sub> | NH <sub>4</sub> <sup>+</sup> ,<br>O <sub>2</sub> replete,<br>no H <sub>2</sub> | NH <sub>4</sub> <sup>+</sup> ,<br>O <sub>2</sub> replete,<br>H <sub>2</sub> |
| <b>Methane oxidation to methanol</b>       |                                              |           |                                 |           |      |                                                               |                                                            |                                                                          |                                                                                |                                                                             |
| <i>pmoC1</i>                               | particulate methane monooxygenase, C subunit | KU509367  | WP_012463847.1                  | Minf_1511 | 99   | 30039                                                         | 37513                                                      | 39558                                                                    | 21                                                                             | 20                                                                          |
| <i>pmoA1</i>                               | particulate methane monooxygenase, A subunit | KU509368  | ABX56601.1                      | Minf_1510 | 100  | 13819                                                         | 17336                                                      | 21307                                                                    | 34                                                                             | 19                                                                          |
| <i>pmoB1</i>                               | particulate methane monooxygenase, B subunit |           | WP_012463845.1                  | Minf_1509 | 99   | 19965                                                         | 24793                                                      | 29076                                                                    | 39                                                                             | 39                                                                          |
| <i>pmoC2</i>                               | particulate methane monooxygenase, C subunit | KU509373  | WP_048810233.1                  | Minf_1500 | 99   | 618                                                           | 550                                                        | 722                                                                      | 4074                                                                           | 3951                                                                        |
| <i>pmoA2</i>                               | particulate methane monooxygenase, A subunit | KU509371  | WP_012463843.1                  | Minf_1507 | 99   | 4525                                                          | 5583                                                       | 6535                                                                     | 90972                                                                          | 67528                                                                       |
| <i>pmoB2</i>                               | particulate methane monooxygenase, B subunit | KU509372  | WP_012463842.1                  | Minf_1506 | 99   | 2623                                                          | 3114                                                       | 3891                                                                     | 50699                                                                          | 30091                                                                       |
| <i>pmoC2</i>                               | particulate methane monooxygenase, C subunit | KU509370  | WP_012463844.1                  | Minf_1508 | 99   | 2084                                                          | 2928                                                       | 3247                                                                     | 63702                                                                          | 45186                                                                       |
| <i>pmoC3</i>                               | particulate methane monooxygenase, C subunit | KU509318  | WP_012463927.1                  | Minf_1591 | 99   | 1                                                             | 1                                                          | 2                                                                        | 3                                                                              | 2                                                                           |
| <i>pmoA3</i>                               | particulate methane monooxygenase, A subunit | KU509319  | WP_012463926.1                  | Minf_1590 | 99   | 0                                                             | 0                                                          | 1                                                                        | 1                                                                              | 0                                                                           |
| <i>pmoB3</i>                               | particulate methane monooxygenase, B subunit | KU509320  | WP_012463925.1                  | Minf_1589 | 97   | 0                                                             | 0                                                          | 0                                                                        | 0                                                                              | 0                                                                           |
| <b>Methanol oxidation to formate</b>       |                                              |           |                                 |           |      |                                                               |                                                            |                                                                          |                                                                                |                                                                             |
| <i>soxF</i>                                | methanol dehydrogenase, large subunit        | KU509410  | WP_012463329.1                  | Minf_0992 | 99   | 9460                                                          | 11221                                                      | 14716                                                                    | 10834                                                                          | 9808                                                                        |
| <i>soxJ</i>                                | unknown function                             | Ga0079954 | WP_012463332.1                  | Minf_0995 | 99   | 1045                                                          | 1317                                                       | 1279                                                                     | 1006                                                                           | 1028                                                                        |
| <i>mxoB</i>                                | transcriptional regulator                    | KU509376  | WP_012463785.1                  | Minf_1449 | 100  | 198                                                           | 194                                                        | 176                                                                      | 669                                                                            | 490                                                                         |
| <i>soxY</i>                                | methanol utilization control sensor protein  | KU509377  | WP_012463784.1                  | Minf_1448 | 100  | 748                                                           | 549                                                        | 629                                                                      | 2874                                                                           | 1498                                                                        |
| <i>mxoR</i>                                | ATPase involved in methanol oxidation        | KU509402  | WP_012463503.1                  | Minf_1166 | 97   | 7                                                             | 6                                                          | 9                                                                        | 7                                                                              | 8                                                                           |
| <b>Formate oxidation to CO<sub>2</sub></b> |                                              |           |                                 |           |      |                                                               |                                                            |                                                                          |                                                                                |                                                                             |
| <i>fdxG</i>                                | formate dehydrogenase, gamma subunit         | KU509398  | WP_048810187.1                  |           | 97   |                                                               |                                                            |                                                                          |                                                                                |                                                                             |
| <i>fdxB</i>                                | formate dehydrogenase, beta subunit          | KU509399  | WP_012463566.1                  | Minf_1230 | 100  | 411                                                           | 457                                                        | 543                                                                      | 749                                                                            | 723                                                                         |
| <i>fdxA</i>                                | formate dehydrogenase, alpha subunit         | KU509400  | WP_048810186.1                  | Minf_1229 | 99   | 741                                                           | 763                                                        | 731                                                                      | 1272                                                                           | 1096                                                                        |
| <i>fdxD</i>                                | formate dehydrogenase delta subunit          | KU509401  | WP_048810185.1                  | Minf_1228 | 94   | 7                                                             | 9                                                          | 6                                                                        | 10                                                                             | 12                                                                          |

|                            |                                                                                               |          |                |           |     |      |      |      |      |      |
|----------------------------|-----------------------------------------------------------------------------------------------|----------|----------------|-----------|-----|------|------|------|------|------|
| <i>hpr</i>                 | formate dehydrogenase                                                                         | KU509384 | WP_012463659.1 | Minf_1323 | 99  | 658  | 680  | 968  | 635  | 889  |
| <b>Hydrogen metabolism</b> |                                                                                               |          |                |           |     |      |      |      |      |      |
| <i>hyaF</i>                | hydrogenase-1 operon protein                                                                  | KU509388 | WP_012463654.1 | Minf_1318 | 99  | 382  | 487  | 561  | 54   | 61   |
| <i>hyaC</i>                | oxygen-tolerant membrane-bound [NiFe] - hydrogenase, cytochrome <i>b</i> subunit              | KU509387 | WP_012463655.1 | Minf_1319 | 99  | 278  | 405  | 354  | 47   | 42   |
| <i>hyaB</i>                | oxygen-tolerant membrane-bound [NiFe] hydrogenase, large subunit                              | KU509386 | WP_012463656.1 | Minf_1320 | 99  | 2065 | 2767 | 2724 | 208  | 223  |
| <i>hyaA</i>                | oxygen-tolerant membrane-bound [NiFe] hydrogenase, small subunit                              | KU509385 | WP_048810203.1 | Minf_1321 | 99  | 2509 | 3105 | 3041 | 213  | 255  |
| <i>hyhB</i>                | NADP-coupled cytosolic bidirectional hydrogenase, FeS subunit                                 | KU509477 | WP_012464721.1 | Minf_2387 | 99  | 206  | 245  | 195  | 158  | 147  |
| <i>crp</i>                 | cyclic nucleotide-binding domain-containing protein                                           | KU509476 | WP_012464722.1 | Minf_2388 | 97  | 91   | 93   | 61   | 62   | 51   |
| <i>hyhG</i>                | NADP-coupled cytosolic bidirectional hydrogenase, diaphorase subunit NAD(P)H-flavin reductase | KU509475 | WP_012464723.1 | Minf_2389 | 98  | 107  | 141  | 127  | 79   | 64   |
| <i>hyhS</i>                | NADP-coupled cytosolic bidirectional hydrogenase, small subunit                               | KU509474 | WP_012464724.1 | Minf_2390 | 98  | 106  | 124  | 118  | 67   | 87   |
| <i>hyhL</i>                | NADP-coupled cytosolic bidirectional hydrogenase, large subunit                               | KU509473 | WP_012464725.1 | Minf_2391 | 98  | 48   | 69   | 62   | 50   | 60   |
| <i>hypB</i>                | hydrogenase maturase protein, Ni storage                                                      | KU509355 | WP_012464135.1 | Minf_1799 | 99  | 1304 | 1068 | 1100 | 422  | 351  |
| <i>hypC</i>                | hydrogenase maturase protein, Fe- (CN <sup>-</sup> ) <sub>2</sub> -CO insertion               | KU509357 | WP_012464132.1 | Minf_1796 | 100 | 1304 | 1359 | 1299 | 1460 | 1200 |
| <i>hypD</i>                | hydrogenase maturase protein, Fe- (CN <sup>-</sup> ) <sub>2</sub> -CO insertion               | KU509358 | WP_012464131.1 | Minf_1795 | 99  | 318  | 346  | 329  | 291  | 382  |
| <i>hypE</i>                | hydrogenase maturase protein, CN <sup>-</sup> ligand biosynthesis                             | KU509359 | WP_012464130.1 | Minf_1794 | 99  | 195  | 214  | 238  | 181  | 195  |
| <i>hypF</i>                | hydrogenase maturase protein, CN <sup>-</sup> ligand biosynthesis                             | KU509356 | WP_012464133.1 | Minf_1797 | 99  | 79   | 93   | 103  | 47   | 57   |
| <b>Copper homeostasis</b>  |                                                                                               |          |                |           |     |      |      |      |      |      |
| <i>cueR</i>                | copper resistance operon regulatory protein                                                   | KU509440 | WP_012462789.1 | Minf_0449 | 99  | 164  | 139  | 142  | 139  | 190  |
| <i>copA</i>                | Cu(I)-translocating P-type ATPase/ multicopper oxidase, copper-binding site                   | KU509375 | gb ABX56608.1  |           | 99  |      |      |      |      |      |
| <i>cueO</i>                | multicopper oxidase family protein                                                            | KU509374 | WP_048810228.1 | Minf_1469 | 99  | 1410 | 1628 | 1717 | 1130 | 922  |

|             |                                            |           |                |           |    |     |     |     |     |     |
|-------------|--------------------------------------------|-----------|----------------|-----------|----|-----|-----|-----|-----|-----|
| <i>cusA</i> | copper efflux pump                         | KU509461  | WP_012462437.1 | Minf_0095 | 99 | 76  | 76  | 85  | 89  | 84  |
| <i>cusB</i> | copper efflux pump membrane fusion protein | Ga0079954 | WP_012462436.1 | Minf_0094 | 98 | 106 | 106 | 121 | 104 | 121 |
| <i>cusS</i> | copper sensor histidine kinase             | KU509433  | WP_012462941.1 | Minf_0601 | 99 | 54  | 54  | 53  | 57  | 75  |
| <i>cusR</i> | DNA binding copper response regulator      | KU509432  | WP_048810437.1 | Minf_0602 | 99 | 258 | 367 | 307 | 249 | 318 |

#### Coenzyme PQQ synthesis

|             |                                  |          |                |           |     |      |      |      |       |      |
|-------------|----------------------------------|----------|----------------|-----------|-----|------|------|------|-------|------|
| <i>pqqB</i> | coenzyme PQQ synthesis protein B | KU509397 | WP_012463570.1 | Minf_1234 | 99  | 2186 | 2568 | 2367 | 2576  | 1491 |
| <i>pqqC</i> | coenzyme PQQ synthesis protein C | KU509396 | WP_012463571.1 | Minf_1235 | 99  | 900  | 1110 | 971  | 697   | 547  |
| <i>pqqD</i> | coenzyme PQQ synthesis protein D | KU509395 | WP_048810188.1 | Minf_1236 | 98  | 593  | 695  | 564  | 376   | 375  |
| <i>pqqD</i> | coenzyme PQQ synthesis protein D | KU509434 | WP_012462864.1 | Minf_0524 | 97  | 16   | 16   | 13   | 16    | 13   |
| <i>pqqE</i> | coenzyme PQQ synthesis protein E | KU509394 | WP_048810189.1 | Minf_1237 | 99  | 444  | 386  | 354  | 268   | 286  |
| <i>pqqA</i> | Coenzyme PQQ synthesis protein A | KY820885 | WP_012463569.1 | Minf_1233 | 100 | 5251 | 5719 | 8763 | 12668 | 7397 |

No homologs of *pqqG pqqF*

#### Glycogen synthesis

|             |                                                     |          |                |           |    |     |     |     |     |     |
|-------------|-----------------------------------------------------|----------|----------------|-----------|----|-----|-----|-----|-----|-----|
| <i>mdoG</i> | glycans biosynthesis protein                        | KU509364 | WP_012463952.1 | Minf_1616 | 98 | 32  | 37  | 42  | 21  | 17  |
| <i>mdoG</i> | glycans biosynthesis protein                        | KU509365 | WP_012463951.1 | Minf_1615 | 99 | 103 | 97  | 83  | 58  | 72  |
|             | glucan elongation module (mdoH-like)                | KU509366 | WP_048810251.1 | Minf_1612 | 99 | 46  | 50  | 55  | 50  | 36  |
| <i>GH57</i> | glycosyl hydrolase family 57                        | KU509382 | WP_012463665.1 | Minf_1329 | 99 | 133 | 170 | 155 | 140 | 159 |
| <i>amyA</i> | alpha amylase, catalytic domain                     | KU509383 | WP_012463664.1 | Minf_1328 | 98 | 244 | 267 | 254 | 268 | 229 |
| <i>glgA</i> | glycogen synthase                                   | KU509360 | WP_012464092.1 | Minf_1756 | 99 | 50  | 62  | 65  | 58  | 64  |
| <i>glgA</i> | glycogen synthase (ADP-glucose)                     | KU509479 | WP_048810560.1 | Minf_2355 | 98 | 165 | 179 | 211 | 101 | 198 |
| <i>glgB</i> | 1,4-alpha-glucan branching enzyme                   | KU509409 | WP_012463357.1 | Minf_1020 | 99 | 123 | 134 | 122 | 93  | 146 |
| <i>glgC</i> | glucose-1-phosphate adenylyltransferase             | KU509460 | WP_048810004.1 | Minf_0180 | 99 | 235 | 216 | 241 | 222 | 174 |
| <i>glgP</i> | starch phosphorylase                                | KU509451 | WP_012462597.1 | Minf_0255 | 99 | 305 | 325 | 337 | 274 | 384 |
| <i>glgP</i> | starch phosphorylase                                | KU509431 | WP_012462995.1 | Minf_0658 | 99 | 462 | 470 | 450 | 311 | 349 |
| <i>glgP</i> | starch phosphorylase                                | KU509429 | WP_012463128.1 | Minf_0791 | 99 | 140 | 178 | 195 | 171 | 236 |
| <i>gdb1</i> | glycogen debranching enzyme (alpha-1,6-glucosidase) | KU509417 | WP_012463227.1 | Minf_0890 | 99 | 143 | 173 | 165 | 149 | 194 |
| <i>rfaG</i> | glycosyltransferase                                 | KU509418 | WP_012463226.1 | Minf_0889 | 99 | 18  | 18  | 19  | 17  | 20  |
| <i>glcD</i> | glycolate oxidase                                   | KU509414 | WP_048810142.1 | Minf_0895 | 98 | 198 | 238 | 273 | 264 | 281 |
| <i>glcD</i> | glycolate oxidase FAD binding subunit               | KU509413 | WP_012463233.1 | Minf_0896 | 98 | 22  | 22  | 27  | 34  | 20  |

|                            |                                                                                  |          |                |           |     |      |      |      |      |      |
|----------------------------|----------------------------------------------------------------------------------|----------|----------------|-----------|-----|------|------|------|------|------|
| <i>aceB</i>                | malate synthase                                                                  | KU509415 | WP_012463229.1 | Minf_0892 | 98  | 49   | 62   | 48   | 40   | 53   |
| <i>aceA</i>                | isocitrate lyase                                                                 | KU509416 | WP_048810457.1 |           | 98  |      |      |      |      |      |
| <i>manB</i>                | phosphoglucomutase                                                               | KU509328 | WP_012464463.1 | Minf_2127 | 99  | 253  | 239  | 243  | 250  | 264  |
| <b>Calvin-Benson Cycle</b> |                                                                                  |          |                |           |     |      |      |      |      |      |
| <i>cbbS</i>                | ribulose 1,5-bisphosphate carboxylase, small subunit                             | KU509390 | WP_012463599.1 | Minf_1263 | 98  | 1957 | 1904 | 2444 | 1825 | 2219 |
| <i>cbbL</i>                | ribulose 1,5-bisphosphate carboxylase, large subunit                             | KU509389 | WP_012463600.1 | Minf_1264 | 99  | 2770 | 3154 | 3935 | 2894 | 3691 |
| <i>cbbX</i>                | probable Rubsico expression protein CbbX                                         | KU509391 | WP_012463598.1 | Minf_1262 | 99  | 1044 | 1087 | 1183 | 1148 | 1167 |
| <i>pgk</i>                 | phosphoglycerate kinase                                                          | KU509406 | WP_048810158.1 | Minf_1032 | 98  | 530  | 555  | 673  | 739  | 634  |
| <i>gapA</i>                | glyceraldehyde-3-phosphate dehydrogenase                                         | KU509405 | WP_012463370.1 | Minf_1033 | 99  | 864  | 972  | 1345 | 1414 | 1408 |
| <i>fbaA</i>                | putative fructose-bisphosphate aldolase                                          | KU509327 | WP_048810542.1 |           | 98  |      |      |      |      |      |
| <i>fbaA2</i>               | fructose-bisphosphate aldolase, class II                                         | KU509448 | WP_012462629.1 | Minf_0287 | 100 | 1443 | 1397 | 1746 | 1136 | 1467 |
| <i>fbp</i>                 | fructose-1,6-bisphosphatase I                                                    | KU509361 | WP_012464020.1 | Minf_1684 | 99  | 503  | 525  | 668  | 497  | 623  |
| <i>glpX</i>                | fructose-1,6-bisphosphatase II                                                   | KU509381 | WP_012463695.1 | Minf_1359 | 100 | 1115 | 1093 | 1080 | 1256 | 914  |
| <i>tktB</i>                | transketolase                                                                    | KU509393 | WP_012463596.1 | Minf_1260 | 99  | 866  | 985  | 1020 | 957  | 1145 |
| <i>xfp</i>                 | xylulose-5-phosphate/fructose-6-phosphate phosphoketolase                        | KU509412 | WP_012463240.1 | Minf_0903 | 99  | 255  | 262  | 264  | 233  | 298  |
| <i>tpiA</i>                | triosephosphate isomerase                                                        | KU509407 | WP_012463368.1 | Minf_1031 | 98  | 479  | 489  | 573  | 699  | 595  |
| <i>rpiB</i>                | ribose 5-phosphate isomerase B                                                   | KU509459 | WP_012462539.1 | Minf_0197 | 99  | 732  | 706  | 692  | 726  | 702  |
| <i>prkB</i>                | phosphoribulokinase                                                              | KU509392 | WP_012463597.1 | Minf_1261 | 100 | 848  | 903  | 1043 | 837  | 1115 |
| <i>rpe</i>                 | ribulose-phosphate 3-epimerase                                                   | KU509354 | WP_012464174.1 | Minf_1838 | 99  | 353  | 391  | 477  | 254  | 394  |
| <b>TCA cycle</b>           |                                                                                  |          |                |           |     |      |      |      |      |      |
| <i>gltA</i>                | citrate synthase                                                                 | KU509447 | WP_012462674.1 | Minf_0334 | 99  | 641  | 528  | 509  | 363  | 608  |
| <i>acnA</i>                | aconitate hydratase                                                              | KU509408 | WP_012463364.1 | Minf_1027 | 99  | 190  | 163  | 130  | 121  | 295  |
| <i>icd</i>                 | isocitrate dehydrogenase                                                         | KU509411 | WP_012463276.1 | Minf_0939 | 99  | 655  | 514  | 462  | 644  | 733  |
| <i>sucA</i>                | 2-oxoglutarate dehydrogenase, E1 component                                       | KU509464 | WP_048810403.1 | Minf_0067 | 98  | 703  | 497  | 333  | 458  | 772  |
| <i>sucB</i>                | 2-oxoglutarate dehydrogenase, E2 component, dihydrolipoamide succinyltransferase | KU509463 | WP_012462410.1 | Minf_0068 | 98  | 420  | 412  | 451  | 400  | 622  |

|             |                                                                                     |          |                |           |     |     |     |     |     |     |
|-------------|-------------------------------------------------------------------------------------|----------|----------------|-----------|-----|-----|-----|-----|-----|-----|
| <i>lpdA</i> | pyruvate/2-oxoglutarate dehydrogenase, E3 component, dihydrolipoamide dehydrogenase | KU509462 | WP_012462411.1 | Minf_0069 | 99  | 256 | 285 | 267 | 230 | 373 |
| <i>lpdA</i> | pyruvate/2-oxoglutarate dehydrogenase, E3 component, dihydrolipoamide dehydrogenase | KU509362 | WP_012463971.1 | Minf_1635 | 98  | 382 | 351 | 320 | 287 | 335 |
| <i>sucD</i> | succinyl-CoA synthetase subunit alpha                                               | KU509403 | WP_012463383.1 | Minf_1046 | 99  | 347 | 382 | 324 | 254 | 612 |
| <i>sucC</i> | succinyl-CoA synthetase subunit beta                                                | KU509404 | WP_048810162.1 | Minf_1045 | 99  | 533 | 309 | 238 | 259 | 890 |
| <i>sdhB</i> | succinate dehydrogenase, catalytic subunit                                          | KU509442 | WP_012462728.1 | Minf_0388 | 99  | 380 | 305 | 305 | 253 | 358 |
| <i>sdhA</i> | succinate dehydrogenase, flavoprotein subunit                                       | KU509441 | WP_012462729.1 | Minf_0389 | 98  | 319 | 294 | 260 | 233 | 371 |
| <i>sdhC</i> | succinate dehydrogenase, cytochrome b subunit                                       | KU509443 | WP_012462727.1 | Minf_0387 | 98  | 268 | 179 | 138 | 191 | 147 |
| <i>fumC</i> | fumarase                                                                            | KU509428 | WP_012463130.1 | Minf_0793 | 100 | 254 | 331 | 335 | 273 | 410 |
| <i>mdh</i>  | malate dehydrogenase                                                                | KU509380 | WP_048810212.1 |           | 99  |     |     |     |     |     |

#### ATP Synthase

|             |                                                            |          |                |           |     |      |      |      |      |      |
|-------------|------------------------------------------------------------|----------|----------------|-----------|-----|------|------|------|------|------|
| <i>atpD</i> | F-type H <sup>+</sup> -transporting ATPase subunit beta    | KU509426 | WP_048810122.1 | Minf_0839 | 99  | 162  | 201  | 191  | 165  | 166  |
| <i>atpC</i> | F-type H <sup>+</sup> -transporting ATPase subunit epsilon | KU509425 | WP_012463177.1 | Minf_0840 | 99  | 145  | 145  | 142  | 137  | 128  |
|             | ATP synthase protein I                                     | KU509424 | WP_012463178.1 | Minf_0841 | 98  | 68   | 57   | 51   | 61   | 49   |
| <i>atpB</i> | ATP synthase F <sub>0</sub> subcomplex A subunit           | KU509423 | WP_012463179.1 | Minf_0842 | 98  | 75   | 76   | 72   | 60   | 70   |
| <i>atpE</i> | F-type H <sup>+</sup> -transporting ATPase subunit c       | KU509422 | WP_012463180.1 | Minf_0843 | 98  | 86   | 96   | 97   | 60   | 63   |
| <i>atpF</i> | ATP synthase F <sub>0</sub> subcomplex B subunit           | KU509421 | WP_012463181.1 | Minf_0844 | 99  | 382  | 341  | 421  | 322  | 280  |
| <i>atpA</i> | F-type H <sup>+</sup> -transporting ATPase subunit alpha   | KU509420 | WP_012463182.1 | Minf_0845 | 99  | 82   | 119  | 112  | 84   | 104  |
| <i>atpG</i> | F-type H <sup>+</sup> -transporting ATPase subunit gamma   | KU509419 | WP_012463183.1 | Minf_0846 | 100 | 101  | 123  | 94   | 90   | 103  |
| <i>atpH</i> | F-type H <sup>+</sup> -transporting ATPase subunit delta   | KU509469 | WP_012464754.1 | Minf_2420 | 99  | 1661 | 2092 | 2473 | 1441 | 2144 |
| <i>atpB</i> | F-type H <sup>+</sup> -transporting ATPase subunit a       | KU509472 | WP_012464751.1 | Minf_2417 | 99  | 1650 | 1964 | 2579 | 1681 | 1702 |
| <i>atpE</i> | F-type H <sup>+</sup> -transporting ATPase subunit c       | KU509471 | WP_012464752.1 | Minf_2418 | 100 | 3536 | 3881 | 4151 | 3415 | 3505 |
| <i>atpF</i> | F-type H <sup>+</sup> -transporting ATPase subunit b       | KU509470 | WP_048810391.1 | Minf_2419 | 99  | 4700 | 4389 | 5540 | 3788 | 4236 |
| <i>atpA</i> | F-type H <sup>+</sup> -transporting ATPase subunit alpha   | KU509468 | WP_012464755.1 | Minf_2421 | 99  | 2501 | 2513 | 2846 | 1891 | 2890 |
| <i>atpG</i> | F-type H <sup>+</sup> -transporting ATPase subunit gamma   | KU509467 | WP_012464756.1 | Minf_2422 | 99  | 1588 | 1364 | 1711 | 1314 | 1779 |
| <i>atpD</i> | F-type H <sup>+</sup> -transporting ATPase subunit beta    | KU509466 | WP_012464757.1 | Minf_2423 | 100 | 1984 | 1906 | 2136 | 1731 | 2270 |
| <i>atpC</i> | F-type H <sup>+</sup> -transporting ATPase subunit epsilon | KU509465 | WP_012464758.1 | Minf_2424 | 100 | 3651 | 3035 | 3783 | 2972 | 2887 |

| <b>NADH dehydrogenase</b>                           |                                                                  |          |                |           |     |      |      |      |      |      |
|-----------------------------------------------------|------------------------------------------------------------------|----------|----------------|-----------|-----|------|------|------|------|------|
| <i>nuoB</i>                                         | NADH-quinone oxidoreductase subunit B                            | KU509458 | WP_012462551.1 | Minf_0209 | 99  | 922  | 1094 | 1013 | 613  | 1179 |
| <i>nuoA</i>                                         | NADH-quinone oxidoreductase subunit A                            | KU509480 | WP_012464634.1 | Minf_2300 | 99  | 900  | 716  | 759  | 966  | 694  |
| <i>nuoC</i>                                         | NADH-quinone oxidoreductase subunit C                            | KU509457 | WP_012462552.1 | Minf_0210 | 100 | 1410 | 1522 | 1849 | 1411 | 2286 |
| <i>nuoD</i>                                         | NADH-quinone oxidoreductase subunit D                            | KU509456 | WP_012462553.1 | Minf_0211 | 99  | 1020 | 1135 | 1213 | 922  | 1438 |
| <i>nuoE</i>                                         | NADH-quinone oxidoreductase subunit E                            | KU509455 | WP_012462554.1 | Minf_0212 | 99  | 1241 | 972  | 962  | 854  | 1327 |
| <i>nuoF</i>                                         | NADH-quinone oxidoreductase subunit F                            | KU509454 | WP_012462555.1 | Minf_0213 | 99  | 1064 | 982  | 1111 | 785  | 1455 |
| <i>nuoG</i>                                         | NADH-quinone oxidoreductase subunit G                            | KU509453 | WP_012462556.1 | Minf_0214 | 99  | 1397 | 1390 | 1354 | 1104 | 1719 |
| <i>nuoH</i>                                         | NADH-quinone oxidoreductase subunit H                            | KU509452 | WP_012462557.1 | Minf_0215 | 99  | 359  | 326  | 343  | 324  | 387  |
| <i>nuoI</i>                                         | NADH-quinone oxidoreductase subunit I                            | KU509321 | WP_048810348.1 | Minf_2216 | 99  | 174  | 217  | 249  | 228  | 276  |
| <i>nuoJ</i>                                         | NADH-quinone oxidoreductase subunit J                            | KU509322 | WP_048810347.1 | Minf_2215 | 99  | 892  | 978  | 1077 | 800  | 1142 |
| <i>nuoK</i>                                         | NADH-quinone oxidoreductase subunit K                            | KU509323 | WP_012464548.1 | Minf_2214 | 100 | 190  | 288  | 248  | 142  | 276  |
| <i>nuoL</i>                                         | NADH dehydrogenase subunit L                                     | KU509324 | WP_012464547.1 | Minf_2213 | 98  | 426  | 497  | 506  | 334  | 583  |
| <i>nuoM</i>                                         | NADH-quinone oxidoreductase subunit M                            | KU509325 | WP_012464546.1 | Minf_2212 | 99  | 297  | 281  | 353  | 272  | 466  |
| <i>nuoN</i>                                         | NADH dehydrogenase subunit N                                     | KU509326 | WP_012464545.1 | Minf_2211 | 99  | 373  | 399  | 497  | 358  | 747  |
| <b>Cytochrome C oxidase and Complex III (ACIII)</b> |                                                                  |          |                |           |     |      |      |      |      |      |
| <i>cyoE</i>                                         | protoheme IX farnesyltransferase                                 | KU509378 | WP_012463763.1 | Minf_1427 | 99  | 260  | 248  | 273  | 59   | 59   |
| <i>ctaA</i>                                         | cytochrome c oxidase assembly protein subunit 15                 | KU509379 | WP_012463762.1 | Minf_1426 | 99  | 704  | 601  | 648  | 182  | 129  |
| <i>cyoC</i>                                         | cytochrome c oxidase subunit 3                                   | KU509342 | WP_012464286.1 | Minf_1950 | 99  | 1031 | 1216 | 1177 | 498  | 620  |
| <i>cyoA</i>                                         | cytochrome c oxidase subunit 2                                   | KU509344 | WP_012464280.1 | Minf_1944 | 100 | 2021 | 2139 | 2021 | 1162 | 1433 |
| <i>cyoB</i>                                         | cytochrome c oxidase subunit 1                                   | KU509341 | WP_012464287.1 | Minf_1951 | 99  | 1404 | 1406 | 1579 | 974  | 1301 |
|                                                     | <i>caa</i> <sub>3</sub> -type oxidase, subunit IV                | KU509343 | WP_048810305.1 | Minf_1949 | 98  | 1549 | 1307 | 1348 | 570  | 695  |
| <i>cccA</i>                                         | cytochrome c oxidase, <i>cbb</i> <sub>3</sub> -type, subunit III | KU509340 | WP_012464288.1 | Minf_1952 | 100 | 390  | 393  | 436  | 377  | 468  |
| <i>cytC</i>                                         | cytochrome c                                                     | KU509481 | WP_012463333.1 | Minf_0996 | 97  | 462  | 568  | 606  | 480  | 590  |
| <i>ccoO</i>                                         | cytochrome c oxidase <i>cbb</i> <sub>3</sub> -type subunit 2     | KU509339 | WP_012464289.1 | Minf_1953 | 99  | 216  | 257  | 263  | 163  | 300  |
| <i>ccoN</i>                                         | cytochrome c oxidase <i>cbb</i> <sub>3</sub> -type subunit 1     | KU509338 | WP_048810306.1 | Minf_1954 | 99  | 188  | 184  | 202  | 192  | 198  |
|                                                     | cytochrome c & quinol oxidase polypeptide I                      | KU509482 | WP_012462607.1 | Minf_0265 | 91  | 4594 | 5747 | 5636 | 66   | 48   |
|                                                     | heme/copper-type cytochrome/quinol oxidase, subunit 1            | KU509483 | WP_012462607.1 | Minf_0265 | 99  |      |      |      |      |      |

|                                           |                                                                                         |           |                |           |     |       |       |      |      |      |
|-------------------------------------------|-----------------------------------------------------------------------------------------|-----------|----------------|-----------|-----|-------|-------|------|------|------|
| <i>ActG</i> <sup>+</sup>                  | Hypothetical membrane-associated protein                                                | Ga0079954 | WP_012464292.1 | Minf_1956 | 99  | 1466  | 1080  | 1525 | 1322 | 1202 |
| <i>ActF</i> <sup>+</sup>                  | quinol:cytochrome c oxidoreductase quinone-binding subunit 2                            | KU509337  | WP_012464293.1 | Minf_1957 | 99  | 158   | 135   | 165  | 160  | 206  |
| <i>cccA</i> –<br><i>ActE</i> <sup>+</sup> | cytochrome c oxidase, <i>cbb</i> <sub>3</sub> -type, subunit III                        | KU509336  | WP_012464294.1 | Minf_1958 | 99  | 203   | 237   | 274  | 198  | 258  |
| <i>ActD</i> <sup>+</sup>                  | Hypothetical membrane-associated protein                                                | Ga0079954 | WP_012464295.1 | Minf_1959 | 100 | 279   | 251   | 332  | 210  | 292  |
| <i>ActC</i> <sup>+</sup>                  | prokaryotic molybdopterin-containing oxidoreductase family, membrane subunit            | KU509335  | WP_012464296.1 | Minf_1960 | 99  | 166   | 180   | 189  | 146  | 250  |
| <i>hybA</i> –<br><i>ActB</i> <sup>+</sup> | prokaryotic molybdopterin-containing oxidoreductase family, iron-sulfur binding subunit | KU509334  | WP_012464297.1 | Minf_1961 | 99  | 341   | 359   | 388  | 273  | 518  |
| <i>ActA</i> <sup>+</sup>                  | cytochrome c7                                                                           | KU509333  | WP_012464298.1 | Minf_1962 | 99  | 508   | 448   | 518  | 445  | 700  |
| <b>Nitrogen fixation</b>                  |                                                                                         |           |                |           |     |       |       |      |      |      |
| <i>nifH</i>                               | Mo-nitrogenase iron protein subunit NifH                                                | KU509347  | WP_012464212.1 | Minf_1876 | 99  | 15021 | 16403 | 37   | 50   | 54   |
| <i>nifV</i>                               | homocitrate synthase                                                                    | KU509346  | WP_012464213.1 | Minf_1877 | 99  | 652   | 476   | 19   | 18   | 33   |
| <i>nifD</i>                               | Mo-nitrogenase MoFe protein subunit NifD precursor                                      | KU509348  | WP_012464210.1 | Minf_1874 | 99  | 7795  | 8547  | 33   | 47   | 40   |
| <i>nifK</i>                               | Mo-nitrogenase MoFe protein subunit NifK                                                | KU509349  | WP_048810527.1 | Minf_1873 | 99  | 2578  | 2772  | 20   | 28   | 24   |
| <i>nifE</i>                               | nitrogenase molybdenum-cofactor synthesis protein                                       | KU509350  | WP_012464208.1 | Minf_1872 | 99  | 1546  | 1642  | 36   | 34   | 41   |
| <i>nifN</i>                               | nitrogenase molybdenum-iron protein NifN                                                | KU509351  | WP_048810526.1 | Minf_1871 | 99  | 996   | 1100  | 33   | 26   | 60   |
| <i>nifX</i>                               | nitrogen fixation protein NifX                                                          | KU509352  | WP_012464206.1 | Minf_1870 | 100 | 997   | 1088  | 23   | 27   | 61   |
